# Supplementary material
Source: PubMed Central journal article supplement (PMC2987443)
Supplement: supp_123_23_4128__4.pdf [file supp_123_23_4128__4.pdf]

Hp190b M M A K N K E F R P F P S Y T I S I V G L S G T E K D K G N C G V G K C L C N R Y V R R K A D E F Y Y P E H T S V L S T I D F G G R V V N N D H F L Y W G D V I O N G E D G G I D I S R C  
 Xp190b M M A K N K E F R P F P S Y T I S . V G L S G T E K D K G N C G V G K S C L C N R . V R K A D . . . Y E H T S V L S T I D F G G R V V N N D H F L Y W G D . E D G . . . K

Hp190b H V I E Q T E F I D D Q T F L P H R S T N L Q P Y I K R A A T S K L Q S A E K L M Y I C T D Q L G L E Q D F E Q K Q M P E G K L I N V D G F V L C I D V S O G G C N R K F D D D L K F I  
 Xp190b H . I E Q T E F I D D Q T F L P H R S T N L Q P Y I K R A A . K L Q S A E K L M Y I C T D Q L G L E Q D F E Q K Q M P E G K L . D G F . L C I D V S O G G C N R K F D D D L K F .

Hp190b N N L F V T Q L S K S K K F V I I A A T K C D E C V D H Y L R E V Q A F A S N K K N L L V V E T S A R F N V N I E T C F A L V Q M L D K T R S K F K I I P Y L D A Y R T Q R Q L T V I  
 Xp190b N N L . Q L K . K K F . I I A A T K C D E C V D H Y L R E . Q . F A S N K K N L L V V E T S A R N . N . E T C F A L V Q M L D K T R S K F K I I P Y L . A . K I H R Q L V .

Hp190b T A T D K F E K L L V O T V R D Y H A V W K T V S N K L K N H S D Y E E Y I N L E G T R K A K K N T F S K H I E O L K Q E H I R K R R . E E Y . T L F R A F N T L L P K L E E I E L  
 Xp190b . A . D K F . K L I V Q T V R D Y H A V W K T V S N K L K N H D Y E . Y I N L E G T R K A . T F S K H . Q L K Q E H I R K R . E E Y . T L F R N T L L P L E E I E L

Hp190b S S E A L K I M E K R A D F Q L C F V M L E T V F W D T D H I D K V T D R R I P F D L L S T L E A E K V Y Q S H V Q H L L S E K R R V E M K E K F K K T L E I Q F I S P G Q P  
 Xp190b S S E A I Q V L E K R D F L F V M L E T V F W D T D H I D K . D R R I P F D L L S T L E A E K V Y Q S H V Q H L . S E K R R V E M K E K F K K T L E I I S P G Q P

Hp190b W E E L M C F V M D E D E A Y K Y I T E A D S K E V Y C A K H O R E L I E K A K E E F Q E M L F E H S E L F Y D L D L N A T P S D K M S E I H T V L G S E F P R Y K A L Q K L A V  
 Xp190b W E E . M C F V . D E A Y K . I . E D . V Y . H O R E . . E K A K E E F Q E M L F E H S E L F Y D L D L N A T P S . D K M S E I V L E E F R Y K A L Q K L A . R E

Hp190b S L L L K H I G F V Y H F T K E T C L S G Q S C M D I K V E Q V L A S S L L Q S N L L G R M R N L Y H D S T N I D R L N L L I L G K D G L A O E M L A N E I R T Q S T D D E A L D G K I  
 Xp190b S L L L K H I G F V Y H F T K E T C L S G Q S C M D I K V E Q . L A S L L Q G R M R N L Y D S T N . D . N L I L G K D G L A O E M L A N E I R T Q S T D D E . A L D G K I

Hp190b Y E L D L R T V D A K S P Y F L S Q L H V T A A F K P H G C F C V F S S I E S L N F I G D I I G K I R T E A A Q I R K S H Y M I A N L P F F L I L A N Q R D S S K N L P I L R H Q Q Q  
 Xp190b Y E L D L R T V D A S P Y F L S Q L . F K P H G C F C V F S I E S L F I G . I G K I R . A S Q I R . . K I A L P F F L I L A N Q R D . S K N L P I L R H Q Q Q

Hp190b Q L A N K L Q C P F V D V F A G T Y P R K F N E T O I K Q A L R G V L E S V K H N L D V V S F I F A I K E L F S E A D L R I V M C A M C G D P F S V D L I L S P F L D S R T C S A A Q  
 Xp190b Q L A N K L Q C P F V D . F G T Y P R K F N E T O I K Q A L R G V L E S V K H N D . . S P . F I K . S E A D L R I V M C A M C G D P F S V D L I L S P F L D S . . C S A A Q

Hp190b A G Q N I N S L M L D K I I G C K R R R I Q I T I L S Y H S S I G V R K D E L V H G Y I L V Y S A R R K A S M G M L R A F L S E V O D T I P V Q L V A V T D S Q A D F F E N E A I K E  
 Xp190b A G Q I N S L M L D K I I G . K R R R I Q I T I L S Y H S S I G V R K D E L V H G Y I L V Y S A . R K A S M G M L R A F L S E V O D T I P V Q L V A V T D S Q A D F F E N E A I K E

Hp190b L M T E G E H I A T E I A K F T A L Y S L S Q Y H R Q T E V F T F F S D V L E K K T S I E N S Y L A S T R E A S Q C S E N L F T H L P R N G S F A Y I C Y P D S E D D T E A F  
 Xp190b L M T E G E H I A T E I . A K F T A L Y S L S Q Y H R Q T E V F T F F S D V L E K K T S I E N S Y L . T R E . Q C S E N L F T H L P R N G S F A Y Y P D S E D D T E A F

Hp190b P P Y S P I G D D V Q L L F T P S D R S R Y R L D E G N E Y P I H S T P L N C H D H E R N H K V P F P I R K P F A V I Q K T N V N K R L D P N L K T I E A G I G K N P K K Q A I S H T  
 Xp190b P P Y S P I G D D V Q L L F D R S R Y R L D E G N E Y P I H S T P L N C H D H E R N H K V P F P I . P K P . V K V . L D P N L . K T I E A G I G K N P . K Q S .

Hp190b F L A R F E D M D A S D N Y A E F I D T I F K P K Q Y S D F N S I V Y A P D D G Q N H C S I R N S W F V N N T Q Q D E E N G I F S R V T P R G O G E R R P S K Y K Y M S K T L F S K A K S Y  
 Xp190b L H H E D D S D N Y A E F . D T I F K K G . Y . P D D Q N R . H C S I R . . R . Q Q D E E N G . . R . . E R R P S K Y K Y S K T L F S K K S Y

Hp190b L Y R R T H S D A S D D E A L T T A K E T K R K K G R H R G S E E D P L L S P V D S W K G G I D N P A I T S D Q E L D E E K M K K K A T H K V K E D K K Q K K T K N F N P P T A R N W  
 Xp190b R Y R R H S D A S D . E A T T A K E T K R K K . H R S E E D P L L S P V . W K G G I D N P A I T S D Q E . . K K K K K K T H K V K E D K K K K

Hp190b S N Y F G M P L Q D L V T A E K P I P L F V E K C V E F I E D T G L C T E G L Y V S G N K T D Q D N I Q K Q F D Q D H N I N L V S M E V T V N A V A G A L A F F A D L P D F L I  
 Xp190b S N Y F G M P L Q D L V T A E K P I P L F V E K C V E F I E D T G L C T E G L Y V S G N K T D Q D N I Q K Q F D Q D H N I N L V S M E V T V N A V A G A L A F F A D L P D F L I

Hp190b P Y S L H P E L L E A A K I F D K T E R L H A L K E I V K K F H F V N Y D V F R Y V I T H L N R V S Q O H K I N L M T A D N L S I C F W P T L M R P D F E N R E F L S T T K I H Q I  
 Xp190b P Y S L H P E L L E A A K I F D K T E R L H A L K E I V K K F H F V N Y D V F R Y V I T H L N R V S Q O H K I N L M T A D N L S I C F W P T L M R P D F E N R E F L S T T K I H Q I

Hp190b I V V E T F I Q C C Q T F F Y N G E I V E T T N I V A P P F S N F G Q L V E P H V P L Q L P P P L Q P Q L I Q P Q L Q T D F L G I I  
 Xp190b I V V E T F I Q C C Q T F F Y N G E I V E T T N I V A P P F S N F G Q L V E P H V P L Q L P P P L Q P Q L I Q P Q L Q T D F L G I I

□ Rho GAP domain

[ ] GTPase domain

■ Kazrin binding region
