# Supplementary material
Source: PubMed Central journal article supplement (PMC2987443)
Supplement: supp_123_23_4128__7.pdf [file supp_123_23_4128__7.pdf]

**Table S1.** Selected list of novel Kazrin protein interactions suggested from yeast two hybrid screens

| <b>Gene</b> | <b># clones</b> | <b>GenBank #</b> | <b>Notes</b>                                       |
|-------------|-----------------|------------------|----------------------------------------------------|
| ARHGAP      |                 |                  |                                                    |
| 5           | 22              | NM_009706.2      | p190B RhoGAP                                       |
| Pkp4        | 10              | NM_026361.2      | p0071-catenin                                      |
| Ctnnd2      | 6               | NM_008729.2      | $\delta$ -catenin                                  |
| Spna2       | 1               | NM_1076554.1     | $\alpha$ 2-spectrin                                |
| Spnb1       | 1               | NM_013675.3      | $\beta$ 1-spectrin                                 |
| Spnb2       | 1               | NM_175836.2      | $\beta$ 2-spectrin                                 |
| Camsap1     | 1               | NM_001115076.1   | Calmodulin-regulated spectrin-associated protein 1 |
| Sympk1      | 1               | NM_006605.2      | Symplekin                                          |
| FRMD4a      | 3               | NM_172475.2      | FERM domain containing protein 4a                  |
| Smchd1      | 1               | NM_028887.3      | SMC hinge domain containing protein 1              |
