# Supplementary material
Source: PubMed Central journal article supplement (PMC2987443)
Supplement: supp_123_23_4128__8.pdf [file supp_123_23_4128__8.pdf]

**Table S2.** C-cadherin rescue of xKazrin depletion

| Injection  |                       | Number of embryos  |        |                          | # Expts |
|------------|-----------------------|--------------------|--------|--------------------------|---------|
| Morpholino | RNA                   | Total ( <i>n</i> ) | Normal | Reduced tissue integrity |         |
| 20 ng CMO  | 100 pg $\beta$ -gal   | 89                 | 88     | 1                        | 3       |
| 20 ng KMO1 | 100 pg $\beta$ -gal   | 77                 | 18     | 59                       | 3       |
| 20 ng KMO1 | 100 pg HA-xC-cadherin | 81                 | 37     | 44                       | 3       |
| 20 ng CMO  | 100 pg HA-xC-cadherin | 85                 | 85     | 0                        | 3       |
