# Supplementary material
Source: PubMed Central journal article supplement (PMC2987443)
Supplement: supp_123_23_4128__9.pdf [file supp_123_23_4128__9.pdf]

**Table S3.** Human p190B rescue of xKazrin depletion

| Injection  |                                     | Number of embryos  |        |                          | # Expts. |
|------------|-------------------------------------|--------------------|--------|--------------------------|----------|
| Morpholino | RNA                                 | Total ( <i>n</i> ) | Normal | Reduced tissue integrity |          |
| 20 ng CMO  | 500 pg $\beta$ -gal                 | 104                | 99     | 1                        | 3        |
| 20 ng KMO1 | 500 pg $\beta$ -gal                 | 75                 | 10     | 65                       | 3        |
| 20 ng KMO1 | 100 pg Hp190B + 400 pg $\beta$ -gal | 91                 | 22     | 69                       | 3        |
| 20 ng KMO1 | 500 pg Hp190B                       | 92                 | 46     | 46                       | 3        |
| 20 ng CMO  | 500 pg Hp190B                       | 70                 | 70     | 0                        | 3        |
| Uninjected | Uninjected                          | 81                 | 81     | 0                        | 3        |
