# Supplementary material
Source: PubMed Central journal article supplement (PMC2987443)
Supplement: supp_123_23_4128__10.pdf [file supp_123_23_4128__10.pdf]

**A**

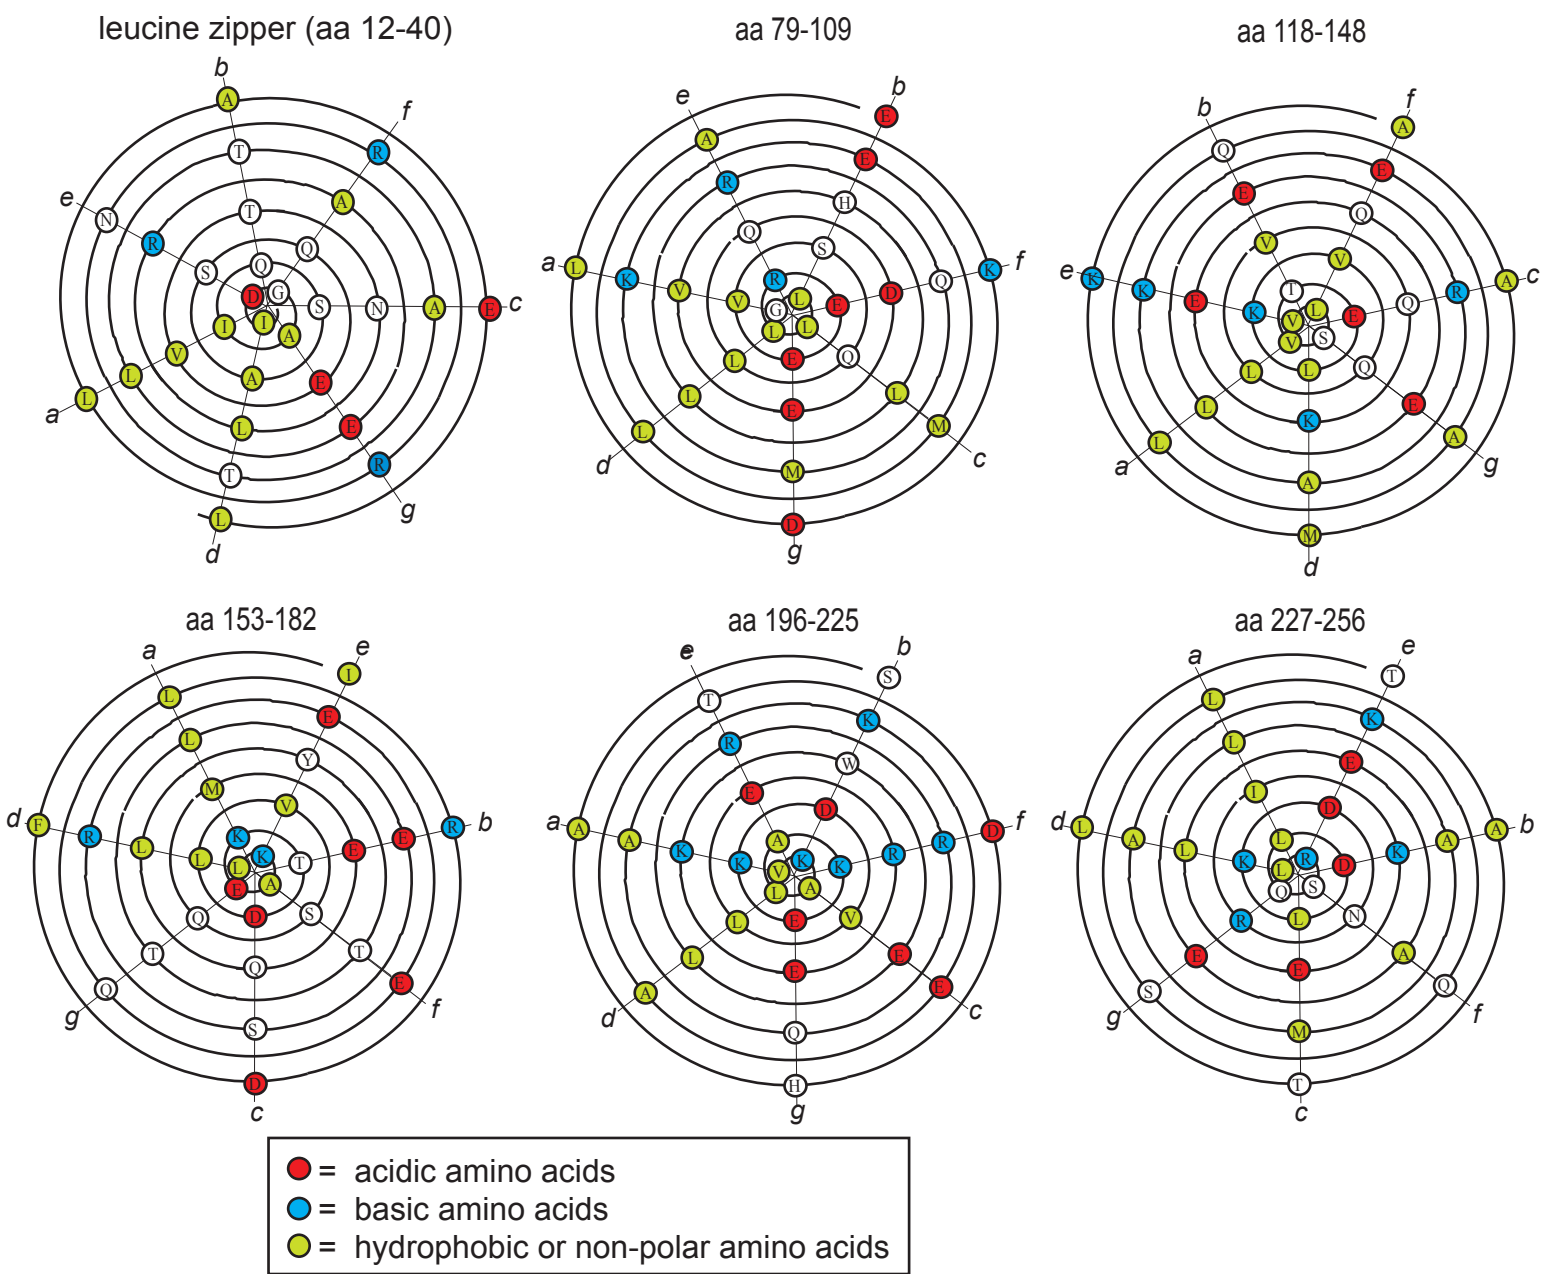

**B**

|              | a       | d       | a       | d     | a       | d     | a       | d                 |
|--------------|---------|---------|---------|-------|---------|-------|---------|-------------------|
| aa 12 - 40   | I D G A | I Q S A | S Q E V | T N L | R A E L | T A T | N R R L | A E L             |
| aa 79 - 109  |         | G L L L | R E E V | S Q L | Q D E V | H L L | R Q M K | E M L A K D L E E |
| aa 118 - 148 | V L S   | V T E L | K V Q L | V Q K | E Q E L | E R A | K E A L | Q A M K A         |
| aa 153 - 182 | L K A E | K T D L | V S Q M | E Q L | Y T T L | E S R | E E Q L | R D F I           |
| aa 196 - 225 |         | V K A L | A K E K | D V L | E R E K | W E L | R R Q A | K E A T D H A S   |
| aa 227 - 256 | L R S Q | L D L K | D N R I | K E L | E A E L | A M A | K Q S L | A T L T           |
