# Supplementary material
Source: PubMed Central journal article supplement (PMC2987443)
Supplement: supp_123_23_4128__11.pdf [file supp_123_23_4128__11.pdf]

**A.** ARVCFmom +

xKazrinA FL

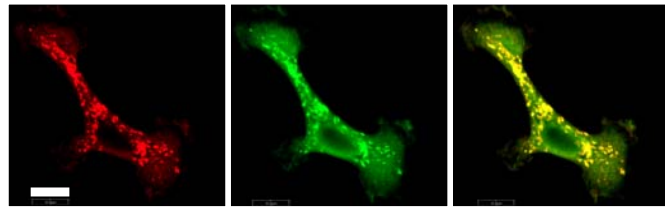 $\Delta$ N1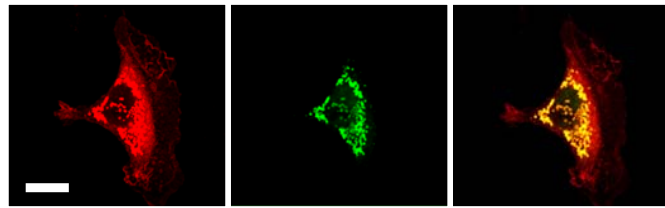 $\Delta$ N2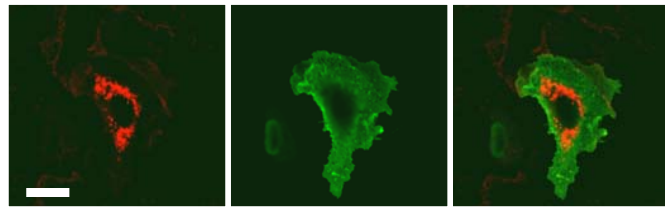 $\Delta$ C1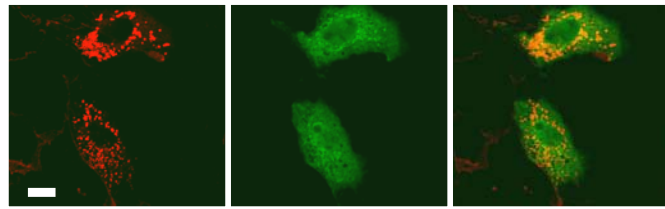 $\Delta$ C2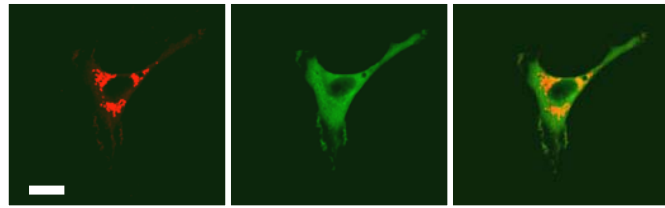 $\Delta$ NLSC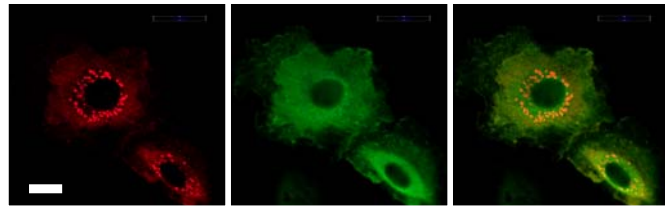

NLSm

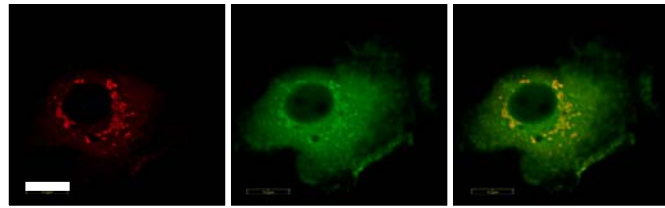xARVCF  
(Anti-HA)xKazrinA  
(Anti-Myc)

Merge

**B.**

xKazrinA FL +

ARV-mom

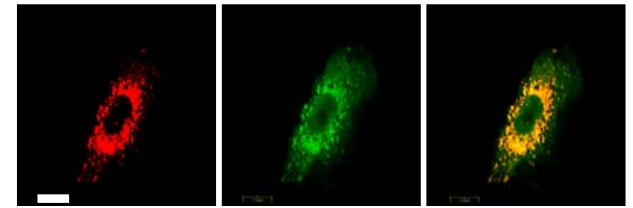

ARV-Nmom

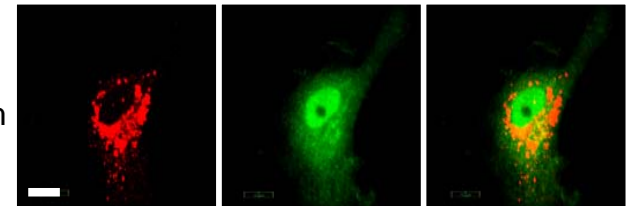

ARV-Amom

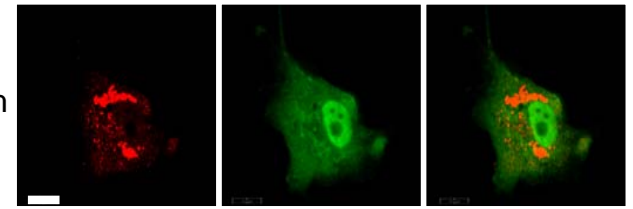

ARV-Cmom

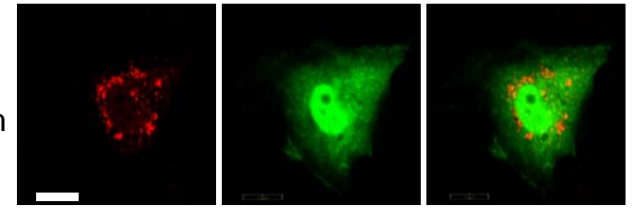

ARV-NAmom

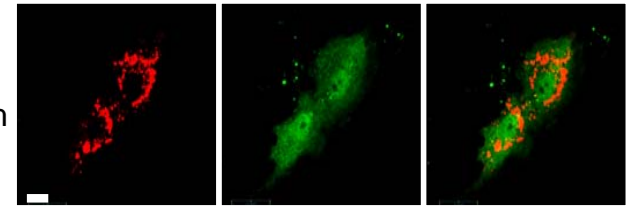

ARV-ACmom

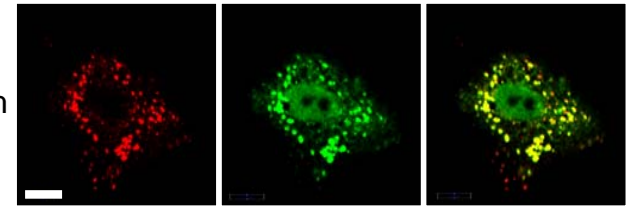xARVCF  
(Anti-HA)xKazrinA  
(Anti-Myc)

Merge
