# Supplementary material
Source: PubMed Central journal article supplement (PMC2987443)

**A**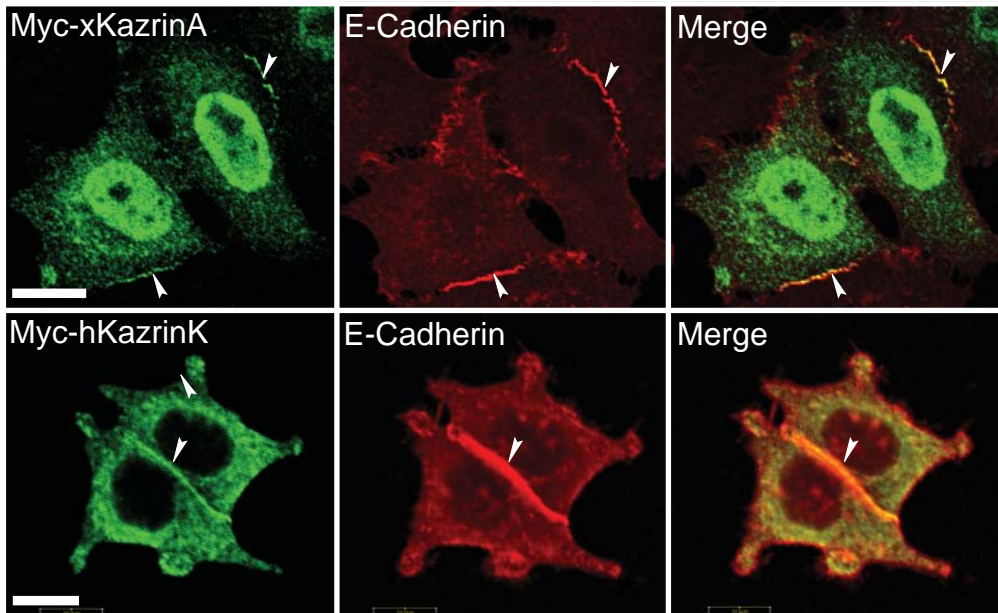**B**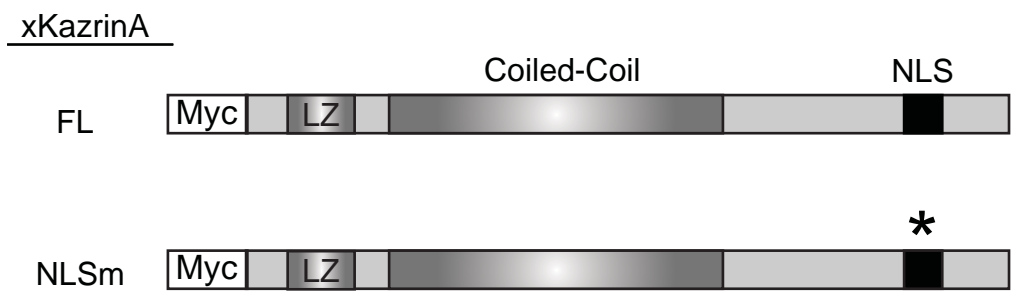

\* = Denotes 4 K to Q mutation

**C**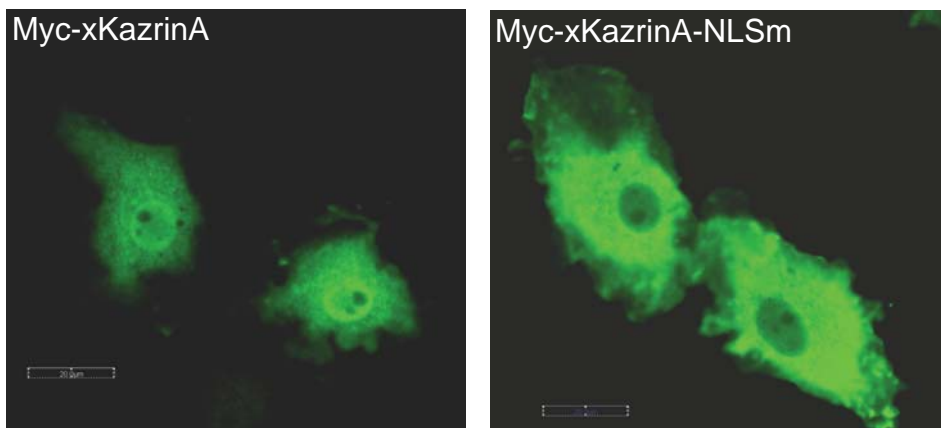

Supplement: supp_123_23_4128__1.pdf [file supp_123_23_4128__1.pdf]

**A**

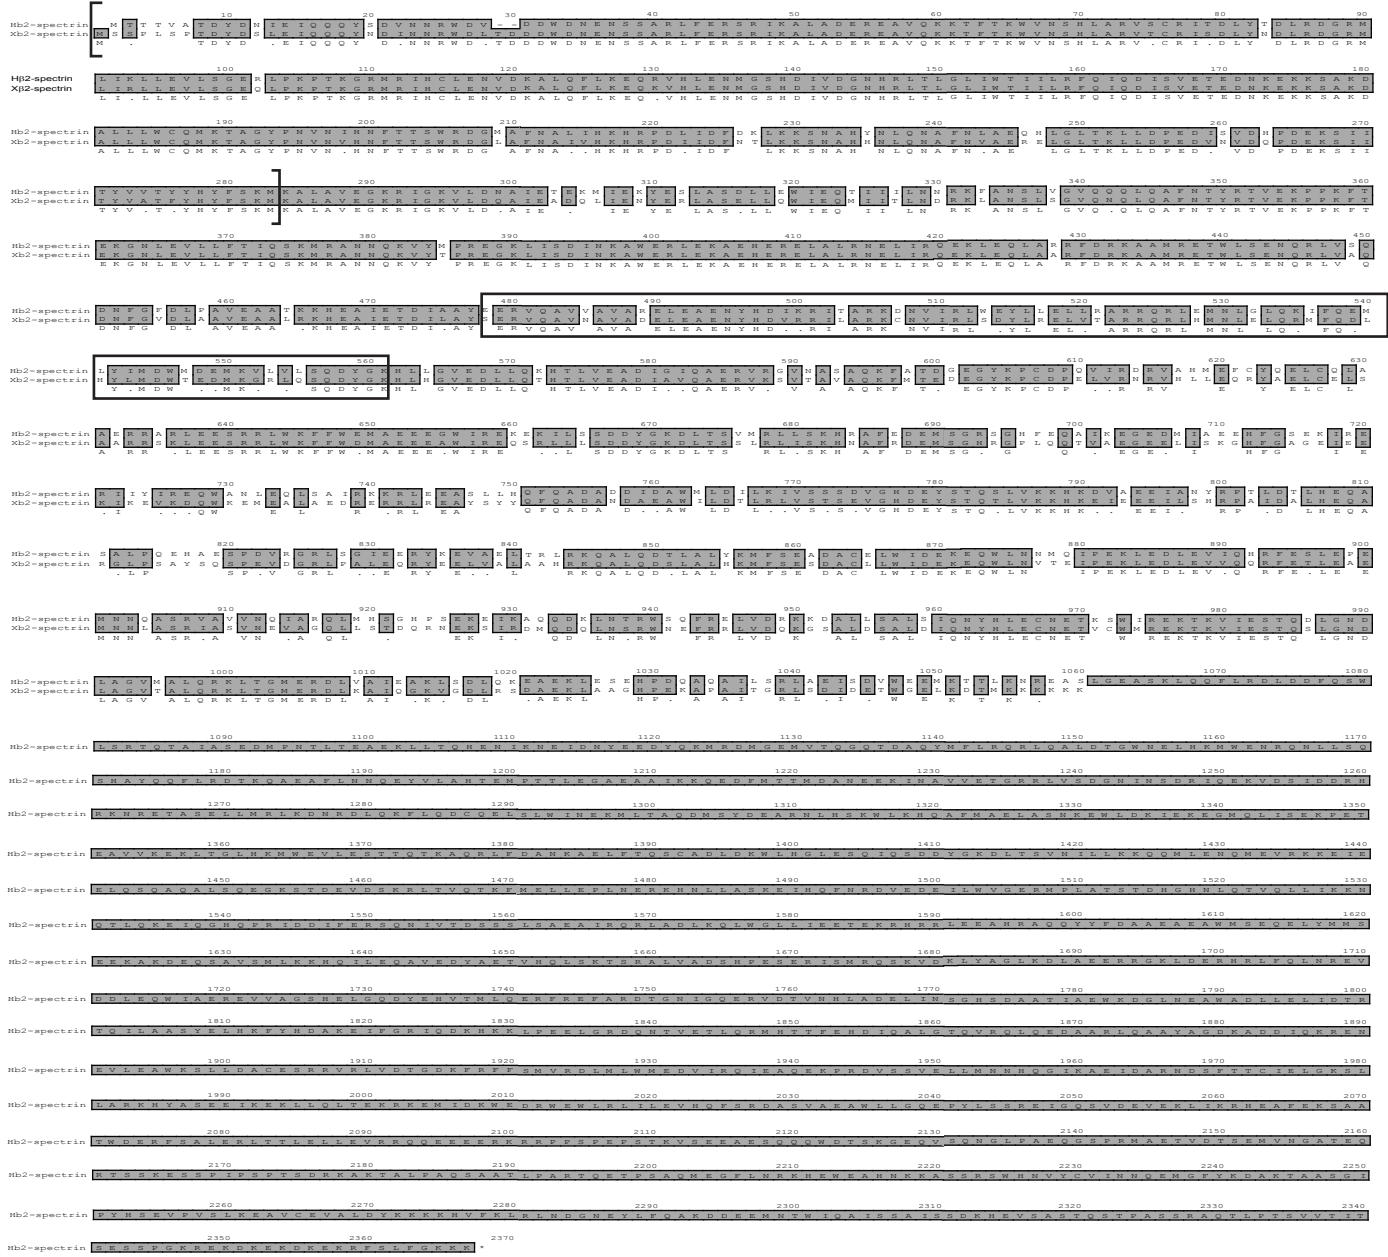

**B**

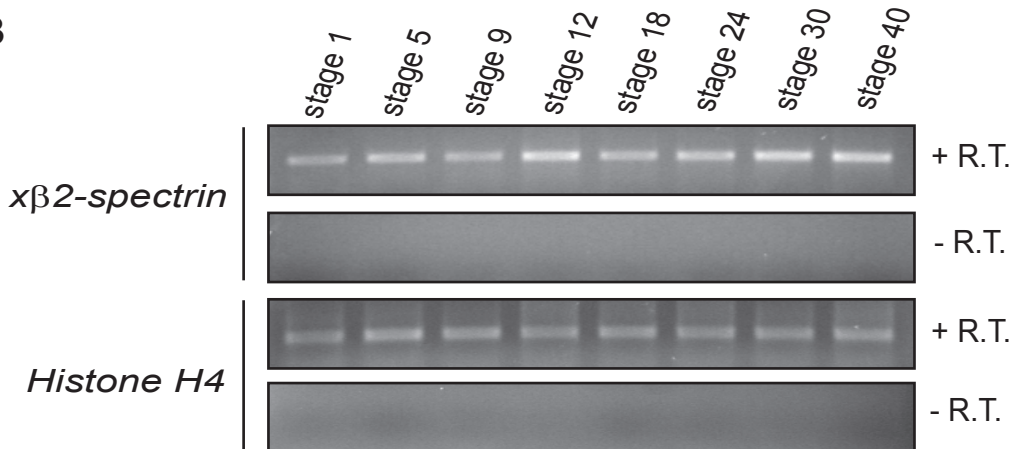

Supplement: supp_123_23_4128__12.pdf [file supp_123_23_4128__12.pdf]

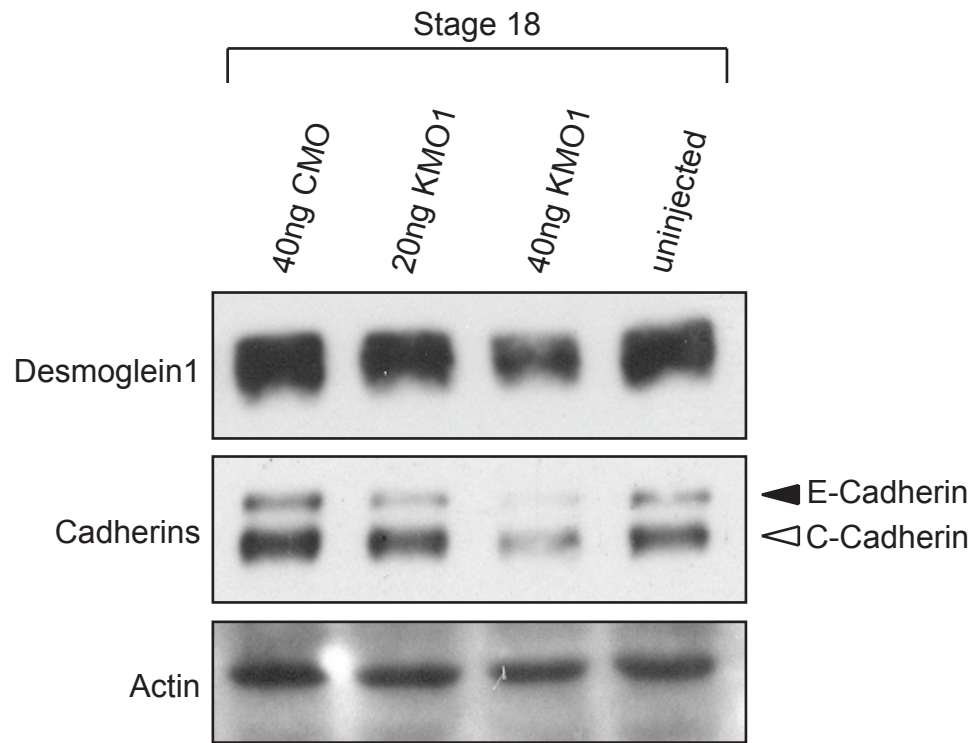

Supplement: supp_123_23_4128__2.pdf [file supp_123_23_4128__2.pdf]

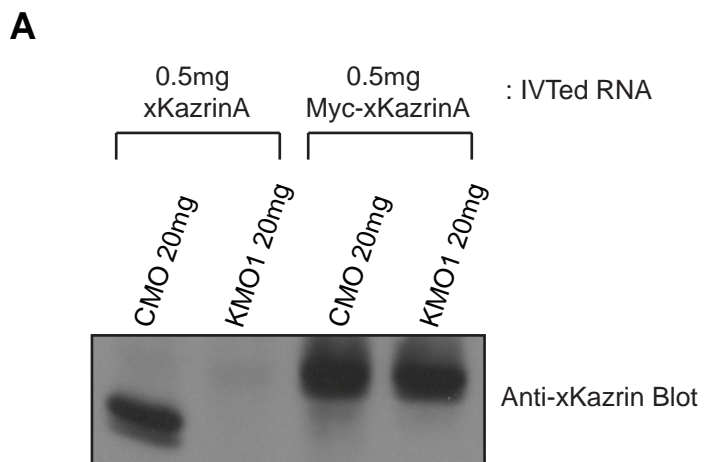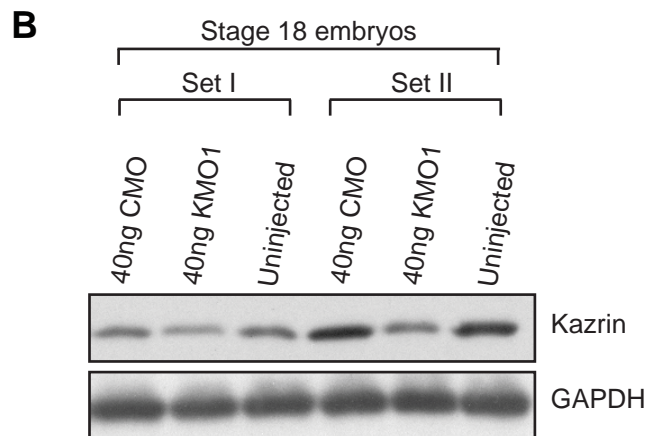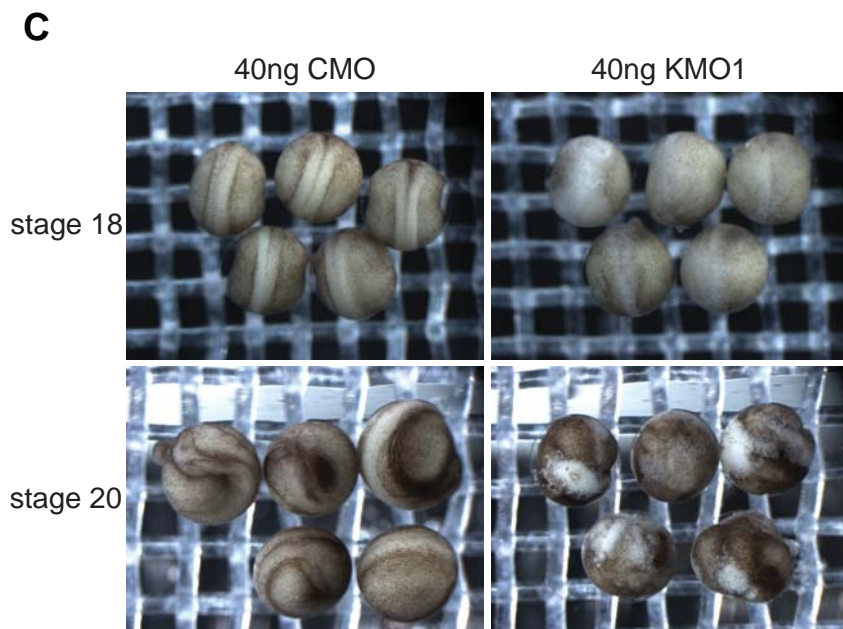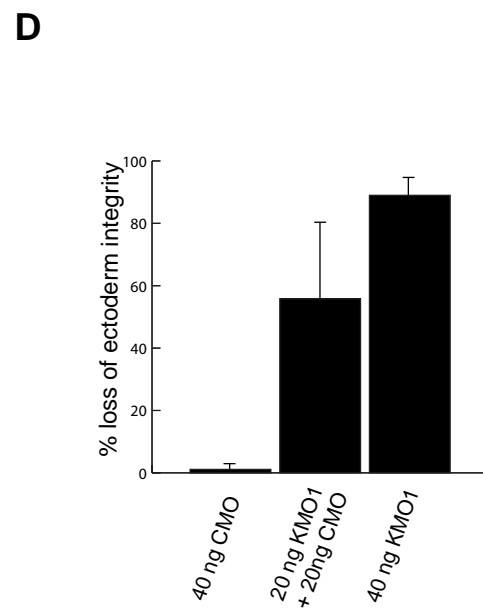

Supplement: supp_123_23_4128__3.pdf [file supp_123_23_4128__3.pdf]

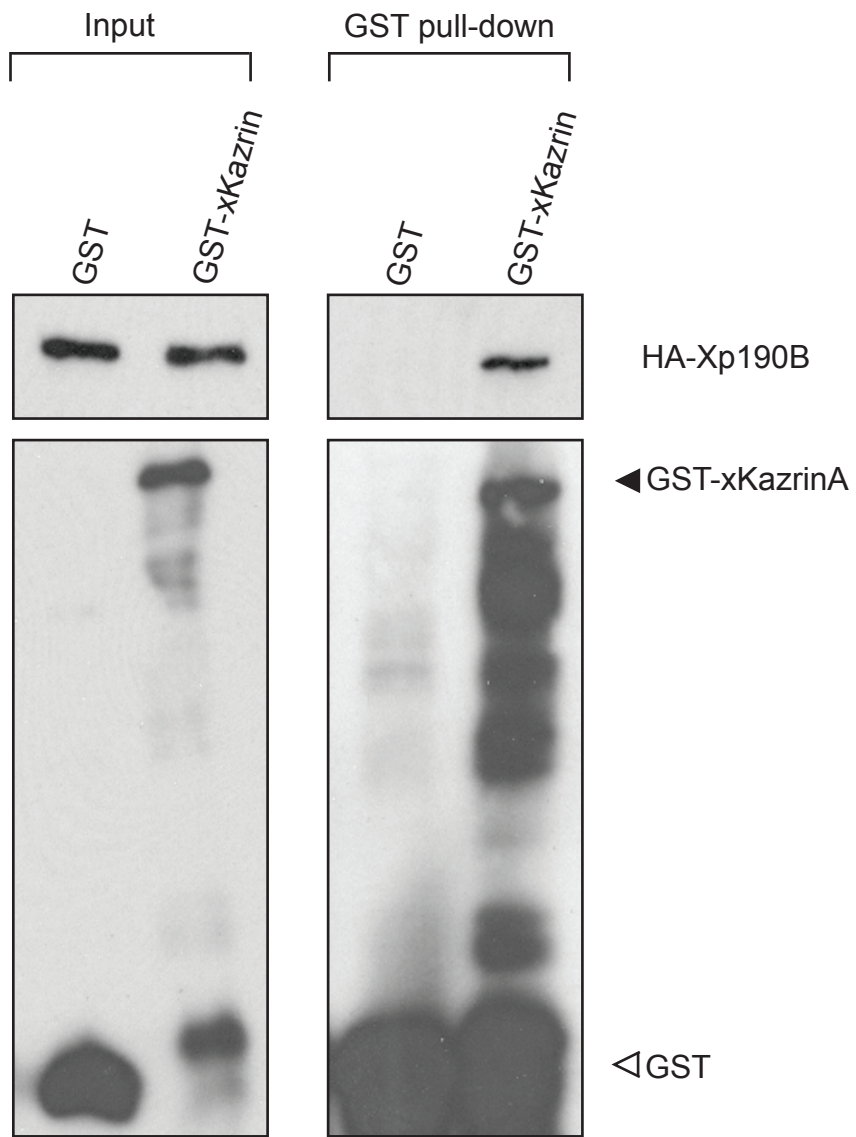

Supplement: supp_123_23_4128__5.pdf [file supp_123_23_4128__5.pdf]

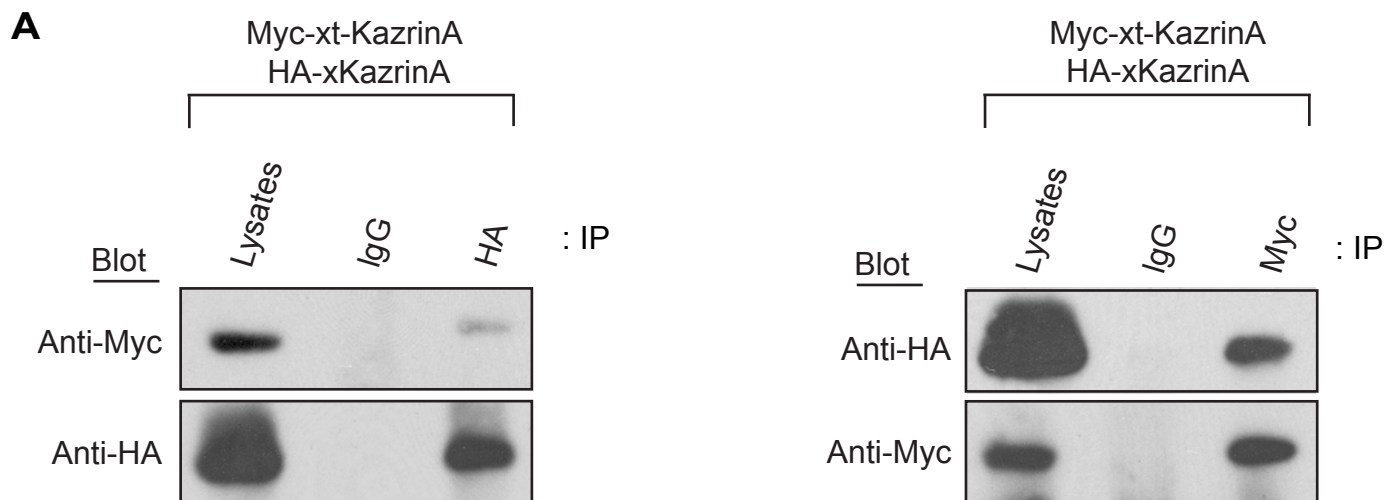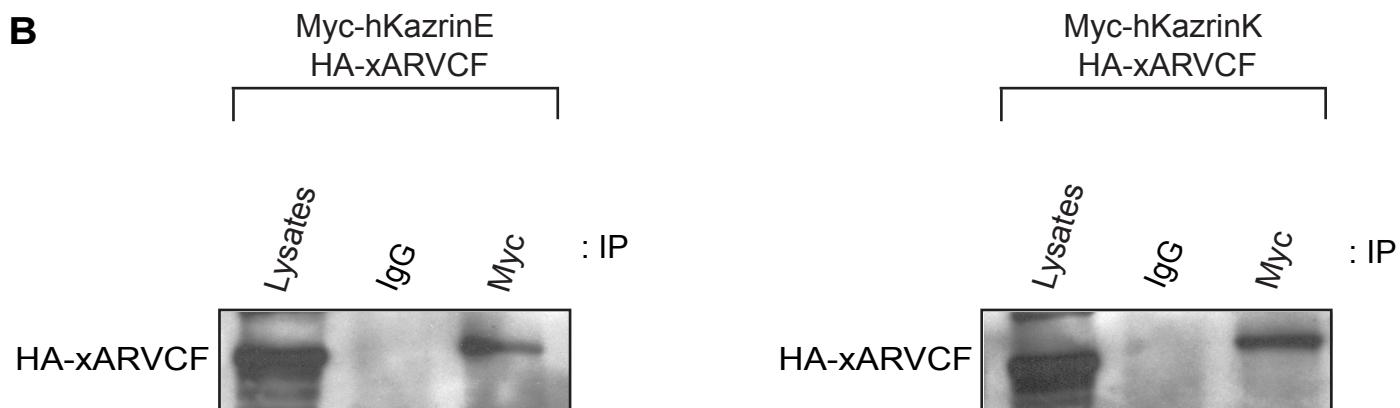

Supplement: supp_123_23_4128__6.pdf [file supp_123_23_4128__6.pdf]
